# Supplementary material for: Hydrothermal decomposition of potassium feldspar under alkaline conditions
Source: Royal Society of Chemistry journal article supplement (doi:10.1039/c5ra17212h), 2015-01-01
Supplement: c5ra17212h1.pdf [file c5ra17212h1.pdf]

## Tables deposited

**Table 1S.** EDS data and phase analysis of different morphology particles

| Sample | Morphology          | T/°C | EDS data                                       |                  |         |        |          | Phase analysis |                                                                     |             |
|--------|---------------------|------|------------------------------------------------|------------------|---------|--------|----------|----------------|---------------------------------------------------------------------|-------------|
|        |                     |      | Chemical formula                               | K:Al:Si          | Ca:Si   | Ca:Al  | Ca:Al+Si |                | Al:Si                                                               |             |
| OK     | original K-feldspar | ~    | $K_{0.92}Al_{1.04}Si_{3.10}O_{8.00}$           | 1:1.13:3.3<br>7  | ~       | ~      | ~        | 1:2.98         | Potassium feldspar                                                  |             |
| NK     | average             | 190  | $K_{0.83}Al_{1.01}Si_{2.86}O_{8.00}$           | 1:1.22:3.4<br>5  | ~       | ~      | ~        | 1:2.83         | Potassium feldspar                                                  |             |
| KK     | average             | 190  | $K_{0.96}Al_{0.99}Si_{2.93}O_{8.00}$           | 1:1.03:3.0<br>5  | ~       | ~      | ~        | 1:2.96         | Potassium feldspar                                                  |             |
| CK-1   | a, fibroid          | 160  | $Ca_{0.88}K_{2.45}Al_{2.61}Si_{8.85}O_{18.00}$ | 1:1.06:3.6<br>1  | 1:10.07 | 1:2.97 | 1:13.04  | 1:3.40         | Transitional compound of $KAlSi_3O_8$ with a few Ca inserted.       |             |
|        | b, spheroidal       |      | $Ca_{2.31}K_{0.43}Al_{2.00}Si_{3.34}O_{18.00}$ | 1:4.69:7.8<br>1  | 1:1.44  | 1:16:1 | 1:2.30   | 1:1.66         |                                                                     | Hydrogarnet |
|        | c, polyhedron       |      | $Ca_{3.07}K_{0.32}Al_{0.96}Si_{3.03}O_{18.00}$ | 1:2.94:9.2<br>2  | 1.01: 1 | 3.18:1 | 1:1.30   | 1:3.14         |                                                                     | UCSH        |
| CK-2   | a, fibroid          | 190  | $Ca_{2.97}K_{2.11}Al_{2.09}Si_{8.42}O_{18.00}$ | 1.01:1:4.0<br>2  | 1:2.83  | 1.41:1 | 1:3.54   | 1:4.02         | Transitional compound of $KAlSi_3O_8$ with substantial Ca inserted. |             |
|        | b, block            |      | $Ca_{5.64}Si_{3.50}O_{18.00}$                  | ~                | 1.61:1  | ~      | ~        | ~              |                                                                     | UCSH        |
| CK-3   | a, fibroid          | 220  | $Ca_{5.58}K_{0.14}Al_{0.69}Si_{3.75}O_{18.00}$ | 1:5.28:28.<br>96 | 1.49:1  | 8.13:1 | 1.26:1   | 1:5.46         | Tobermorite                                                         |             |
|        | b, octahedron       |      | $Ca_{3.91}Al_{2.60}Si_{2.32}O_{18.00}$         | ~                | 1.68:1  | 1.50:1 | 1:1.26   | 1:12:1         | Hydrogarnet.                                                        |             |
|        | c, bar              |      | $Ca_{5.41}Al_{0.77}Si_{4.65}O_{18.00}$         | ~                | 1.16:1  | 7:1    | 1:1      | 1:6.01         | Tobermorite                                                         |             |

|                 |               |     |                                                                                                      |              |             |            |              |           |              |
|-----------------|---------------|-----|------------------------------------------------------------------------------------------------------|--------------|-------------|------------|--------------|-----------|--------------|
| CK-3P           | a, bar        | 220 | $\text{Ca}_{2.17}\text{K}_{0.10}\text{Al}_{0.68}\text{Si}_{2.96}\text{O}_{18.00}$                    | 1:6.98:30.20 | 1:1.37      | 3.20:1     | 1:1.68       | 1:4.37    | Tobermorite. |
|                 | b, spheroidal |     | $\text{Ca}_{4.91}\text{Al}_{0.28}\text{Si}_{1.81}\text{O}_{18.00}$                                   | ~            | 2.71:1      | 17.54:1    | 2.35:1       | 1:6.46    | UCSH         |
|                 | c, needle     |     | $\text{Ca}_{2.50}\text{K}_{0.13}\text{Al}_{0.76}\text{Si}_{3.13}\text{O}_{18.00}$                    | 1:6.06:25.06 | 1:1.25      | 3.31:1     | 1:1.55       | 1:4.14    | Tobermorite. |
| Reference phase | Tobermorite   | ~   | $\text{Ca}_{5-x}\text{Si}_{6-y}\text{Al}_y\text{O}_{17-2x}(\text{OH})_{2x}\cdot 5\text{H}_2\text{O}$ | ~            | 1:1.2-1:1.5 | 1:0-4.17:1 | 1:1.2-1:1.5  | 0:1-1:4   | ~            |
|                 | Hydrogarnet   | ~   | $\text{Ca}_3\text{Al}_2(\text{SiO}_4)_{3-x}(\text{OH})_{4x}$                                         | ~            | 1:0-1:1     | 1.5:1      | 1.5:1-1:1.67 | 1:0-1:1.5 | ~            |

Note: 1. Few square microns area was scanning to measure compositions of OK, NK and KK. Three or more points were chosen to measure an average composition of different shaped particles.

2. H atom was not provided by EDS because of the limited resolution. Therefore, the authors concluded that calcium silicate compound was hydrate, which was based on a general rule of the hydrothermal reaction. The term “unconfirmed calcium silicate hydrate (UCSH)” refers to the phases unconfirmed in this study.

**Table 2S.** Quantitative phase analysis by the Rietveld method and R factors

|       | $R_{wp}$ | $R_p$ | $\chi^2$ | K-feldspar<br>$\text{KAlSi}_3\text{O}_8$ | Portlandite<br>$\text{Ca}(\text{OH})_2$ | Calcite<br>$\text{CaCO}_3$ | Hydrogarnet<br>$\text{Ca}_3\text{Al}_2(\text{SiO}_4)_{1.53}(\text{OH})_{5.88}$ | Dicalcium silicate hydrate<br>$\text{Ca}_2(\text{SiO}_3\text{OH})(\text{OH})$ | Tobermorite<br>$\text{Ca}_5\text{Si}_6\text{H}_2\text{O}_{18}\cdot 4\text{H}_2\text{O}$ | Potassium carbonate<br>$\text{K}_2\text{CO}_3$ | Butschliite<br>$\text{K}_2\text{CaCO}_3$ |
|-------|----------|-------|----------|------------------------------------------|-----------------------------------------|----------------------------|--------------------------------------------------------------------------------|-------------------------------------------------------------------------------|-----------------------------------------------------------------------------------------|------------------------------------------------|------------------------------------------|
| PCK-1 | 14.8     | 11.3  | 1.80     | 45.19                                    | 25.35                                   | 10.50                      | 13.88                                                                          | /                                                                             | /                                                                                       | 5.09                                           | /                                        |
| PCK-2 | 15.7     | 12.3  | 1.97     | 22.72                                    |                                         | 23.08                      | 25.51                                                                          | 14.42                                                                         | 1.57                                                                                    | /                                              | 12.69                                    |
| PCK-3 | 16.8     | 13.0  | 2.28     | 11.41                                    |                                         | 4.62                       | 30.59                                                                          | /                                                                             | 43.05                                                                                   | /                                              | 10.33                                    |
